1 **Cross-Infectivity of *Vorticella* across Genera of Mosquitoes for Development of**  
2 **Biological Mosquito Control Strategies**

3

4 Shelby Durden<sup>1,2</sup>, Anthony Cruz<sup>1</sup>, Wayne B. Hunter<sup>2</sup>, Mustapha Debboun<sup>3</sup>, Dagne Duguma<sup>1,3</sup>

5

6 <sup>1</sup>University of Florida/ IFAS, Florida Medical Entomology Laboratory, Vero Beach, Florida, USA.

7 <sup>2</sup>United States Department of Agriculture, Agricultural Research Service, U.S. Hort. Res. Lab.,

8 2001 South Rock Road, Fort Pierce, Florida, 34945. USA. [Wayne.hunter@usda.gov](mailto:Wayne.hunter@usda.gov) ,  
9 Orchid ID: 0000-0001-8603-3337

9 <sup>3</sup>Harris County Public Health, Mosquito and Vector Control Division, Houston, Texas, USA.

10 **Contact:** [Dagne.Dugma@phs.hctx.net](mailto:Dagne.Dugma@phs.hctx.net)

11

12

13

14 *Corresponding Author:*

15 **Shelby Durden,**

16 United States Department of Agriculture/ ARS, 2001 South Rock Road, Fort Pierce, Florida

17 (772) 708-3756

18 [Sdurden97@gmail.com](mailto:Sdurden97@gmail.com)

19

20 **Keywords:**

21 *Vorticella*, biocontrol, *Culex nigripalpus*, *Culex quinquefasciatus*, *Aedes albopictus*

22

23 **ABSTRACT**

24 Protozoans in general comprise about one-third of the parasitic species infecting arthropod vectors,  
25 the role of free-living ciliates on mosquitoes have been insufficiently studied either due to their  
26 low pathogenicity or being facultative parasites. Studies have shown that exposure of *Paramecium*  
27 ciliate protists, like *Vorticella* species, to first instar *Cx. nigripalpus* larvae delayed larval  
28 development and reduced biomass of emerged adults due to competition for food sources like  
29 bacteria and other microbes essential to mosquito growth and survival. Thus, we report on the  
30 capacity of a *Vorticella* protozoan's ability to cross-infect host species and parasitize multiple  
31 mosquito larvae. The unique adapted behavior with the ability to remain on the exuviae in tree  
32 hole habitats provides a novel delivery system to develop products for target species-specific  
33 mosquitocides, larvicides, or viricides to be applied and sustained in aquatic systems.

34

35 **Introduction**

36 Millions of deaths occur annually due to mosquito-borne illnesses such as malaria with the heaviest  
37 burden occurring in sub-Saharan Africa (WHO 2014a). Increasingly, emergence and reemergence  
38 of mosquito-borne viral illnesses such as Dengue, West Nile virus (WNV), and Zika virus  
39 epidemics, around the world are occurring (Gubler 2002; WHO 2014a,b; Liu and Zhou, 2017). To  
40 reduce the mortality and economic losses caused by mosquito-borne diseases, there is a high  
41 demand for new methods of mosquito control. Current mosquito control involves the use of  
42 chemicals and biopesticides that target the larval and adult life stages of the mosquito. These  
43 chemicals can range from organophosphates, insect growth regulators, or pyrethroids (Benelli  
44 2015). However, past and current chemicals in use are having unintended negative effects on the  
45 ecosystem such as the emergence of chemically-resistant mosquito populations. Resistance within

46 the population reduces the already diminished number of pesticides available for effective  
47 mosquito control (Brogdon and McAllister 1998). Stahl (2002) also compiled a report that  
48 presented the negative health and environmental risks of the four common pesticides used for  
49 mosquito control: Scourge, Anvil, Permethrin, and Malathion. Therefore, there is a renewed focus  
50 for alternative, more effective and environmentally friendly control strategies, including use of  
51 biocontrol agents or strategies which provide two avenues of attack: directly reduce mosquito  
52 populations or improve the efficacy of existing pesticides against mosquitoes.

53

54 During a field study of microbial and mosquito community dynamics, larvae of *Aedes aegypti* (L.),  
55 *Ae. albopictus* (Skuse), *Culex nigripalpus* Theobald and *Cx. quinquefasciatus* Say (Diptera:  
56 Culicidae) collected from various habitats, including artificial containers, tree holes, and  
57 waterways in Florida were found to be infected with species of *Vorticella* (Duguma et al. 2017).  
58 Over the course of four months during winter and early spring, *Vorticella* infectivity rates of  
59 mosquito larvae were found to vary across time and the type of substrate found in the larval habitat  
60 in Florida (D. Duguma, *unpublished data*). *Vorticella* is a genus of ciliates commonly found in  
61 aquatic habitats in association with mosquito larvae and other zooplankton. This ciliate protist has  
62 a contractile stalk used for attaching itself to substances *via* the means of a biopolymer glue (Cabral  
63 et al. 2017). Attachment to mobile organisms, such as the mosquito larvae, gives *Vorticella* a  
64 competitive advantage over other microbes in finding food (Kankaala and Eloranta 1987). Some  
65 studies have shown a parasitic relationship between *Vorticella* and the mosquito larval host. For  
66 example, Patil et al. (2016) demonstrated that *Anopheles stephensi* L. and *Ae. aegypti* larvae  
67 inoculated with *Vorticella* showed reduced larval growth, slower development and adult  
68 emergence. These findings indicated a potential use of *Vorticella* as a mosquito biocontrol agent

69 to augment chemical insecticides in use. While suggested by Patil et al. (2016) that *Vorticella* may  
70 infect *Anopheles* and *Aedes* species, in this study we examined whether *Vorticella* from *Aedes*  
71 genus infects *Cx. nigripalpus* and *Cx. quinquefasciatus* and whether it impacts the two species  
72 differently. *Culex nigripalpus* and *Cx. quinquefasciatus* are prominent disease vectors in Florida  
73 and southern United States for Saint Louis encephalitis and WNV (King et al. 1960, Day and Curtis  
74 1994, Mores et al. 2007). The larval mosquito community was examined to identify major  
75 *Vorticella* sites of attachment on the integument of the mosquitoes and whether it can transfer from  
76 larval stages to adults.

77

## 78 **Materials and Methods**

79 *Mosquito collection:* Twenty *Vorticella*- infected *Ae. albopictus* late (3<sup>rd</sup> to 4<sup>th</sup>) instar larvae were  
80 collected from a tree hole located on the property of Indian River Mosquito Control District  
81 (coordinates 27.6661° N, 80.4438° W) and used as source of *Vorticella* for investigation in the  
82 laboratory. The uninfected *Cx. nigripalpus* and *Cx. quinquefasciatus* larvae were hatched from egg  
83 rafts collected from mesocosms located at the University of Florida, Institute of Food and  
84 Agriculture Sciences, Florida Medical Entomology Laboratory (coordinates 27.58672, -  
85 80.371069). Egg rafts were contained individually in wells of tissue culture plates in distilled water  
86 until they hatched. The larvae were identified to species under a dissection microscope using  
87 taxonomic keys from Darsie and Morris (2003). The larvae of each of the mosquito species were  
88 transferred to plastic trays. Larvae were fed a diet of ground brewer's yeast and liver powder (1:1)  
89 and kept in an incubator at 27± 1 °C.

90 *Vorticella isolation and inoculation:* The infected *Ae. albopictus* larvae collected from the field  
91 were individually dissected using sterile forceps and vortexed in one mL of 1X Phosphate Buffer

92 Solution (PBS) solution (pH 7.2) to promote *Vorticella* suspension. The suspensions were each  
93 dispensed among two groups: Group one was: 10 *Cx. nigripalpus*/container; and Group two was:  
94 10 *Cx. quinquefasciatus* /container. Each group had 10 plastic containers, 250 mL each, with 200  
95 mL of deionized water. Five untreated plastic buckets each containing 10 *Cx. nigripalpus*, or 10  
96 *Cx. quinquefasciatus* were included to serve as control treatments. The experiment was carried out  
97 in an incubator at  $27 \pm 1$  °C and larval observations were made over a one month period for  
98 *Vorticella* infection. At first sighting of larval pupation, the remaining larvae were observed for  
99 infection by visual observation under a dissecting microscope, and monitored until their emergence  
100 to adults. Sixteen infected larval samples (9 *Cx. quinquefasciatus* and 7 *Cx. nigripalpus*) were  
101 placed individually in 1.0 ml of 200 proof ethanol for imaging. Light microscopy images were  
102 taken using a Keyence VHX-5000 Digital Microscope (Keyence Corporation of America, Itasca,  
103 IL, USA). Scanning Electron Microscope (SEM) images were taken using Hitachi S-4800  
104 Scanning Transmission Electron Microscopy (STEM) (Hitachi High Technologies America, Inc.,  
105 Peasanton, CA, USA) to closely examine parasitic relationship between *Vorticella* and *Ae.*  
106 *albopictus* larval samples. All microscopy imaging was performed at the USDA-ARS, U.S.  
107 Horticultural Research Lab, Electron Microscope Unit, Fort Pierce, FL, USA.

108 *Data analysis:* To determine differences between *Vorticella* infection rate of *Cx. nigripalpus* and  
109 *Cx. quinquefasciatus* larvae, unpaired t-test was conducted. Non-parametric Kruskal-Wallis test  
110 followed by Dunn's post hoc mean comparison was performed to determine differences in  
111 mortality rate between larval mosquitoes subjected to *Vorticella* and mosquitoes subjected to  
112 untreated control. A similar analysis was conducted for differences in pupation among different  
113 larval groups. The difference in total number of adults emerged between *Cx. nigripalpus* and *Cx.*

114 *quinquefasciatus* larvae was evaluated using unpaired t-test. All statistical analyses and graphs  
115 were conducted using GraphPad Prism 7 (GraphPad Prism Software Inc. San Diego, CA, USA).

116

## 117 **Results**

118 We examined *Vorticella*'s ability to cross-infect across genera of mosquitoes and documented the  
119 presence of *Vorticella* on different parts of larval mosquito hosts (**Fig. 1**). Using the procedure  
120 described in a previous study (Patil et al. 2016), *Vorticella* isolated from *Ae. albopictus* larvae was  
121 successfully transferred to two species of *Culex* mosquito larvae (i.e., *Cx. nigripalpus* and *Cx.*  
122 *quinquefasciatus*). Upon microscopic examination, major sites of infestation were determined to  
123 be along the larva's abdominal segments, the thorax and the siphon (**Fig. 1A**). Both dorsal and  
124 ventral body parts of the second to fourth larval instars and exuviae were seen infected with  
125 *Vorticella* but not pupae or adults. *Vorticella* remained on the exuviae of the host larva during its  
126 metamorphosis to pupa suggesting that this *Vorticella* species might be restricted to immature  
127 mosquito life stages. Their attachment to the exuviae may facilitate their transition to new larval  
128 mosquito cohorts or other zooplankton.

129

130 The individual larvae were examined for *Vorticella* infestation at first sight of larval pupation. The  
131 infection rate differed between the two *Culex* species with significantly greater mean number of  
132 *Cx. quinquefasciatus* larvae infected with *Vorticella* than *Cx. nigripalpus* ( $t=3.4$ ,  $df=18$ ,  $P>0.05$ ,  
133 **Fig. 2A**). On average, 52% of *Cx. quinquefasciatus* larvae were infected with *Vorticella*, whereas,  
134 only 22% of *Cx. nigripalpus* was infected with *Vorticella*. Larval mortality differed significantly  
135 between *Vorticella* -infected and non-infected mosquito larvae (Kruskal-Wallis test,  $P \leq 0.05$ , **Fig.**  
136 **2B**). *Culex nigripalpus* experienced greater mortality compared to *Cx. quinquefasciatus*. Greater

137 proportion (~20%) of *Cx. nigripalpus* larvae incurred larval mortality compared to only 10%  
138 observed in *Cx. quinquefasciatus*. Mortality in the larvae of the non-infected *Cx. nigripalpus* larvae  
139 was significantly lower than the larvae exposed to *Vorticella* suggesting that *Vorticella* may have  
140 negative impact on this species. The mean proportion of mortality rates in unexposed control (i.e.,  
141 without *Vorticella* treatment) of *Cx. nigripalpus* and *Cx. quinquefasciatus* was 0 and 13%,  
142 respectively (**Fig. 2D**).

143  
144 The difference in pupation rate among the four treatment groups was not statistically significant  
145 although slightly greater pupation rate occurred in both infected and non-infected *Cx.*  
146 *quinquefasciatus* and non-infected *Cx. nigripalpus* than infected *Cx. nigripalpus* larvae (Kruskal-  
147 Wallis test,  $P > 0.05$ , **Fig. 2C**). However, significantly a greater number (74%) of *Cx.*  
148 *quinquefasciatus* emerged from the *Vorticella*-exposed larvae compared to 52% emergence rate  
149 observed in *Cx. nigripalpus* ( $P \leq 0.05$ , **Fig. 2D**). These findings may suggest mosquito species-  
150 specific effects of the *Vorticella* infestation and warrant further investigation.

151

## 152 **Discussion**

153 *Vorticella* is naturally occurring in freshwater environments which are also breeding sites for  
154 mosquitoes. Although the exact biological relationship is unknown, *Vorticella* appears to have a  
155 symbiotic relationship with the mosquito larvae to provide mobility to the ciliate and a competitive  
156 survival advantage. Micks's (1955) study showed stunted growth and higher mortality rates in  
157 *Vorticella*-infected *An. atroparvus* van Thiel larvae. The effects may be due to the *Vorticella*  
158 secreting products toxic to the larvae which can cause pore formation in the larvae's bodies or that

159 the larvae are unable to remain on the water surface for tracheal breathing due to high levels of  
160 *Vorticella* infestation (Micks 1955).

161

162 While protozoans in general comprise about one-third of the parasitic species infecting arthropod  
163 vectors (Jenkins 1964), the role of free-living ciliates on mosquitoes have been insufficiently  
164 studied either due to their low pathogenicity, or being facultative parasites. A previous study by  
165 Duguma et al. (2017) found that exposure of *Paramecium* ciliate protists to first instar *Cx.*  
166 *nigripalpus* larvae delayed larval development and reduced biomass of emerged adults due to  
167 competition for food sources such as bacteria and other similar-sized microbes found essential to  
168 the growth of mosquitoes (Duguma et al., 2019). In the absence of *Paramecium*, the mosquito  
169 larvae harvested bacterial and other similar small-sized organic particles more efficiently than  
170 when found in association with the protists. Other studies have shown a severe competition for  
171 food between Vorticellid epibionts and Daphnids (Kankaala and Eloranta 1987). In addition, the  
172 heavy infestation of *Vorticella* hampers mobility of its host subjecting the host susceptible to  
173 predation (Kankaala and Eloranta 1987). Although we have not measured growth performances of  
174 larvae in our study, the higher mortality observed in *Cx. nigripalpus* larvae may be attributed to  
175 competition by *Vorticella* for bacterial food sources in addition to their possible physiological  
176 effects on the larvae. However, a similar effect was not observed in *Cx. quinquefasciatus*  
177 suggesting that their effect might be species-specific. These findings show promise in the  
178 utilization of ciliates in mosquito population control.

179

180 The protozoan's ability to cross-infect and parasitize multiple mosquito larvae and its ability to  
181 remain on the exuviae provides a unique delivery system for novel species-specific mosquitocides,



182 or viricides to be applied and sustained in aquatic systems. The need for studies to evaluate these  
183 advantages of *Vorticella* as a potential delivery system, as a form of biological control to reduce  
184 mosquitoes and the spread of vector-borne pathogens, such as Dengue, Zika and West Nile Virus  
185 are being pursued as a sustainable mechanism for mosquito control.

186

## 187 **Acknowledgements**

188 We thank Maria T. Gonzalez, Senior Technician, USDA, STEM Microscopy unit, Fort Pierce,  
189 FL., Jacqueline L. Metz, technical assistance, USDA, and Matthew Hentz for instruction on the  
190 VHX-5000 digital microscope, and Dr. Joseph Krystel for his valuable comments. This study was  
191 supported by funding from Florida Department of Agriculture and Consumer Services.

192 *This research was supported in part by the U.S. Department of Agriculture, Agricultural Research*  
193 *Service.” Mention of trade names or commercial products in this publication is solely for the*  
194 *purpose of providing specific information and does not imply recommendation or endorsement by*  
195 *the U.S. Department of Agriculture. USDA is an equal opportunity provider and employer.*

## 196 **References**

- 197 Benelli, G. Plant-borne ovicides in the fight against mosquito vectors of medical and veterinary  
198 importance: a systematic review. *Parasitol Res* 2015; 114: 3201–3212.  
199  
200 Brogdon, W.G., McAllister, J.C. Insecticide resistance and vector control. *Emerging Infect Dis*  
201 1998; 4: 605-613.  
202  
203 Cabral, A.F., Utz, L.R.P., Velho, L.F.M. Structure and distribution of ciliate epibiont  
204 communities in a tropical floodplain. *Hydrobiologia* 2017; 787: 167-180.  
205  
206 Day, J.F., Curtis, G.A. When it rains, they soar--and that makes *Culex nigripalpus* a  
207 dangerous mosquito. *American Entomologist* 1994; 40:162-167.  
208  
209 Darsie, R.F., Morris, C.D. Keys to the adult females and fourth Instar Larvae of the  
210 mosquitoes of Florida (Diptera, Culicidae). *Tech Bull Fla Mosq Control Assoc* 2003; 1: 1-159.  
211  
212 Duguma, D., Kaufman, M.G. Domingos, S., Arthur, B. Aquatic microfauna alter larval  
213 food resources and affect development and biomass of West Nile and Saint Louis encephalitis

214 vector, *Culex nigripalpus* (Diptera: Culicidae). *Ecology and Evolution* 2017; 7: 3507-3519.  
215  
216 Duguma, D, Hall, M.W., Smartt, C.T, Debboun, M., Neufeld, J.D. Microbiota variations in *Culex*  
217 *nigripalpus* disease vector mosquito of West Nile virus and Saint Louis Encephalitis from different  
218 geographic origins 2019, *PeerJ* 6:e6168 Doi 10.7717/peerj.6168.  
219  
220 Gubler, D.J. The global emergence/resurgence of arboviral diseases as public health  
221 problems. *Arch Med Res* 2002; 33: 330-342.  
222  
223 Jenkins, D.W. Pathogens, parasites, and predators of medically important arthropods. *Bull*  
224 *World Health Organization* 1964; 30: 1-50.  
225  
226 Kankaala, P., Eloranta, P. Epizootic ciliates (*Vorticella* sp.) complete for food with their  
227 host *Daphnia-Longispina* in a small polyhumic lake. *Oecologia* 1987; 73: 203-206.  
228  
229 King, W.V., Bradley, G.H., Smith, C.N., McDuffie, W.C. A handbook of the mosquitoes of  
230 the Southern United States. *United States Department Agriculture* 1960; 173: 118-119.  
231  
232 Liu, Z., Zhou, T. Competence of *Aedes aegypti*, *Ae. albopictus*, and *Culex*  
233 *quinquefasciatus* mosquitoes as Zika virus vectors, China. *Emerging Infectious Dis* 2017;  
234 23:1085-1091.  
235  
236 Mores, C.N., Turell, M.J., Dohm, D.J., Blow, J.A., Carranza, M.T., Quintana, M. Experimental  
237 transmission of West Nile virus by *Culex nigripalpus* from Honduras. *Vector Borne Zoonotic*  
238 *Diseases* 2007; 7: 279-84.  
239  
240 Micks, D. *Vorticella* infestation of *Anopheles atroparvus* larvae. *Journal of Economic Entomology*  
241 1955;48: 215–216.  
242  
243 Patil, C.D., Narkhede, C.P., Suryawanshi, R.K., Patil, S.V. *Vorticella* sp: Prospective  
244 mosquito biocontrol agent. *Journal of Arthropod-Borne Diseases* 2016; 10: 602-607.  
245  
246 Stahl, A. The health effects of pesticides used for mosquito control. *Citizens Campaign for the*  
247 *Environment and Citizens Environmental Research Institute* 2002; 1: 1-15.  
248  
249 WHO. World Malaria Report. *World Health Organization* 2014a.  
250  
251 WHO. A global brief on vector-borne diseases. *World Health Organization* 2014b.  
252  
253

254 **Figure 1.** *Aedes albopictus* (A & D) larval samples collected from tree holes were found to be  
255 highly infested with clusters of *Vorticella*. Image D shows a close-up of major *Vorticella*  
256 infestation along the abdominal segments of the mosquito larva. Scanning Electron Microscopy  
257 (SEM) images of *Vorticella* on mosquito larvae indicate polyp colony (B) or a singles (C). A single  
258 stalk form averaged 31  $\mu\text{m}$  in width and 55  $\mu\text{m}$  in length (E). Images of early instar *Cx. nigripalpus*  
259 (D) and *Cx. quinquefasciatus* (F) larvae infected with *Vorticella* in the laboratory. The red arrow  
260 in image C, depicts *Vorticella* attachment as a single stalk on *Cx. nigripalpus* larvae.

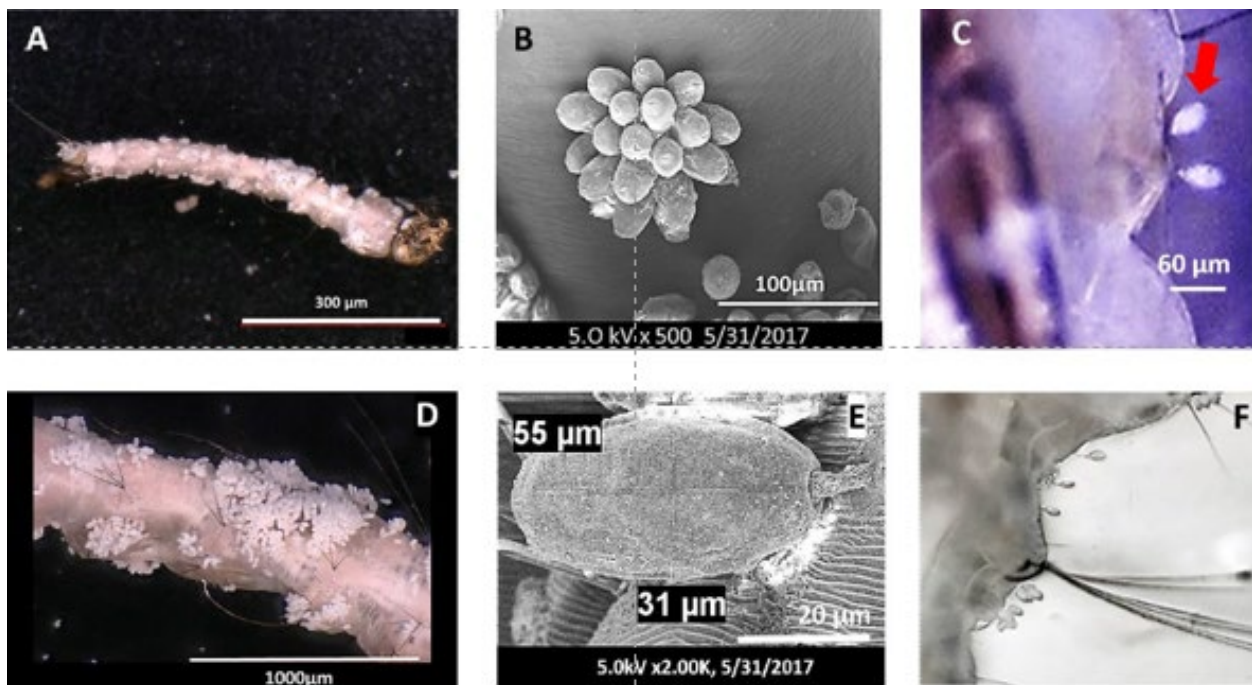

261

262

263

264

265 **Fig. 2.** Box-and Whisker Tukey plot of mosquito *Vorticella*-infection experiment showing (A)  
266 infection susceptibility difference between larvae of *Cx. quinquefasciatus* and *Cx. nigripalpus*, (B)  
267 proportion of larvae died in both *Vorticella*-infected and control (non-infected) larvae of the two  
268 species, (C) proportion of mosquito larvae developed to pupae from larvae infected with *Vorticella*  
269 and control larvae, and (D) proportion of larvae emerged to adults following *Vorticella* infection.  
270 \* Indicates statistically significant differences at  $p \leq 0.05$ , whereas **ns**= not statistically significant  
271 ( $p > 0.05$ ).

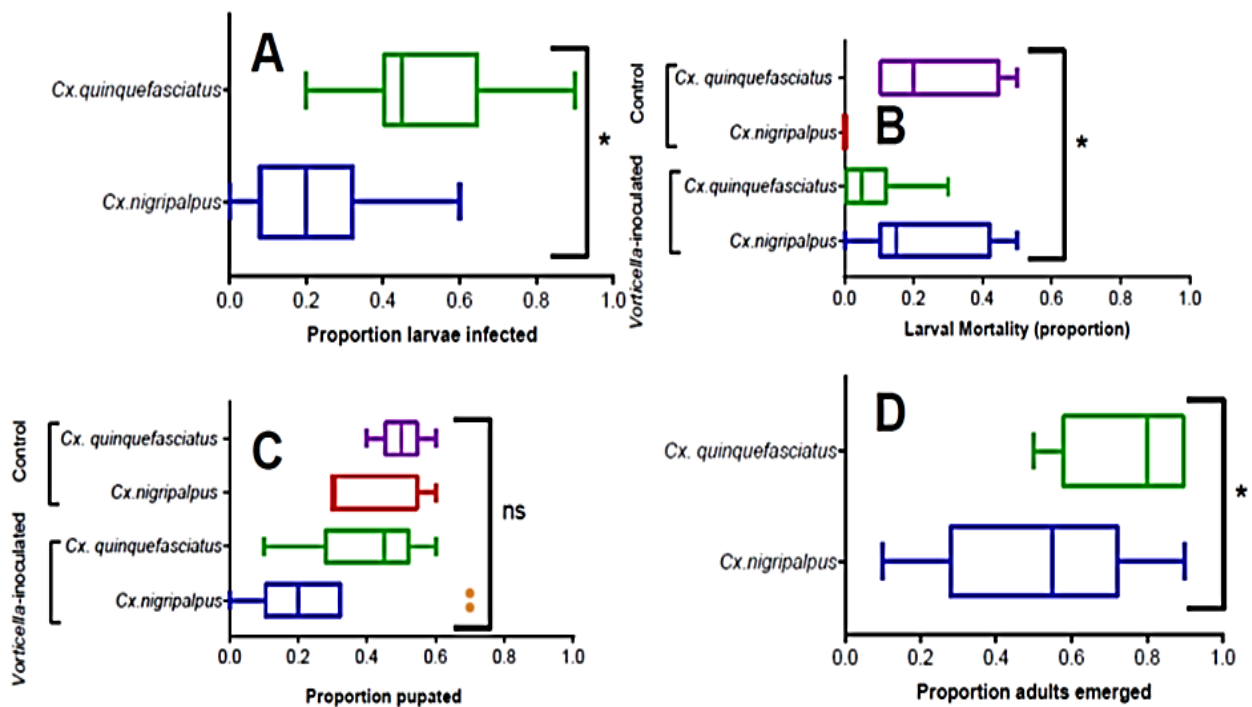

272

273

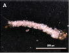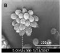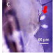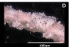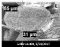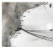

Source: https://www.biorxiv.org/content/10.1101/822536v2.full.pdf
